# Supplementary material for: Sigma-1 Receptor Activation Improves Oligodendrogenesis and Promotes White-Matter Integrity after Stroke in Mice with Diabetic Mellitus
Source: MDPI journal article supplement (doi:10.3390/molecules28010390), 2023-01-02
Supplement: s1 [file s1]

# **Sigma-1 Receptor Activation Improves Oligodendrogenesis and Promotes White-Matter Integrity after Stroke in Mice with Diabetic Mellitus**

**Wenjing Song, Yang Yao, Heling Zhang, Xin Hao, Liping Zhou, Zhixiao Song, Tiantian Wei, Tianyan Chi, Peng Liu \*, Xuefei Ji \* and Libo Zou \***

Department of Pharmacology, Shenyang Pharmaceutical University, 103 Wenhua Road, Shenhe District, Shenyang 110016, China

## **Supplementary Materials**

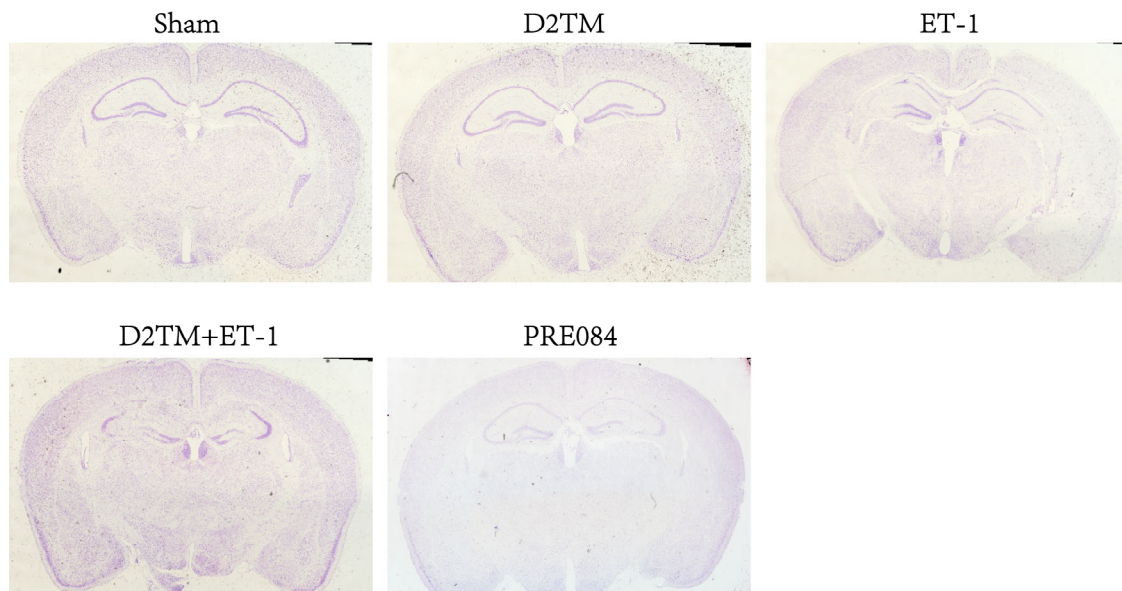

**Figure S1.** ET-1 injection-induced infarct lesions were tested with Nissl staining. n = 4–5/group.

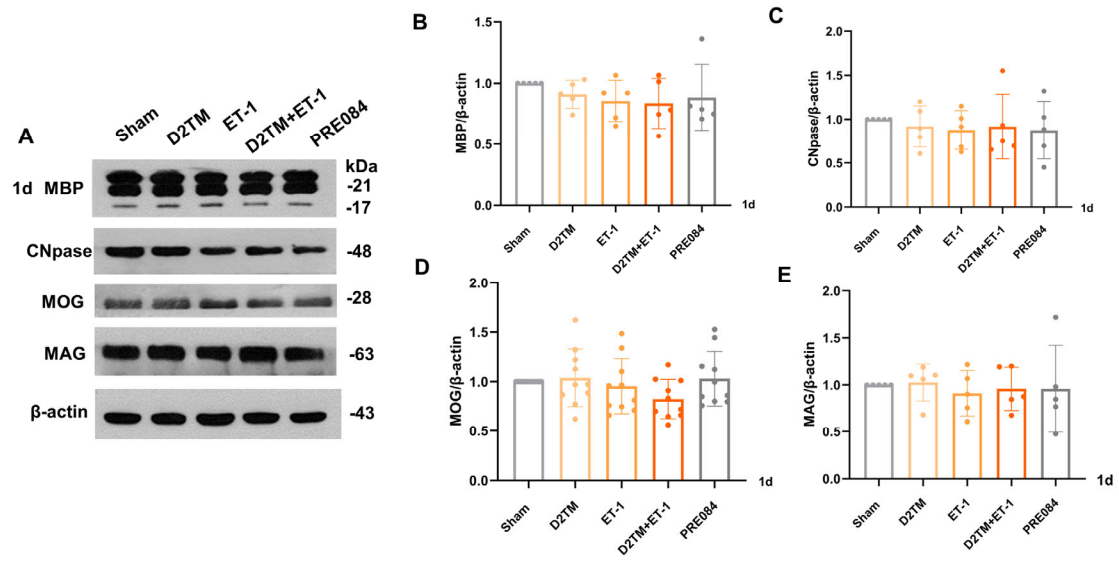

**Figure S2.** PRE084 promoted mature oligodendrogenesis and myelin regeneration in diabetic mice with stroke at 1 d after ET-1 injection. A) Immunoblot analysis of hippocampal tissue with antibodies against MBP, CNpase, MOG, and MAG. B–E) Quantification of the band densities of MBP, CNpase, MOG, and MAG. Data are expressed as mean  $\pm$  SEM;  $n = 5$ /group.
